# Supplementary material
Source: publisher figshare collection journal article supplement (https://acs.figshare.com/ndownloader/files/3844642)
Supplement: Supplementary file 1 [file 3844642]

## SUPPLEMENTAL TABLES AND FIGURES

**Supplemental Table 1 CyDye labeling of protein samples from NIT-1 and  $\alpha$ TC-1**

|                | Cy3                                        | Cy5                                        | Cy2          |
|----------------|--------------------------------------------|--------------------------------------------|--------------|
| <b>Batch 1</b> |                                            |                                            |              |
| Gel 1          | NIT-1                                      | $\alpha$ TC-1                              | Internal Std |
| Gel 2          | NIT-1+IFN- $\gamma$ + IL-1 $\beta$         | NIT-1+IFN- $\gamma$ +TNF- $\alpha$         | Internal Std |
| Gel 3          | $\alpha$ TC-1+IFN- $\gamma$ + IL-1 $\beta$ | $\alpha$ TC-1+IFN- $\gamma$ +TNF- $\alpha$ | Internal Std |
| <b>Batch 2</b> |                                            |                                            |              |
| Gel 4          | $\alpha$ TC-1                              | NIT-1                                      | Internal Std |
| Gel 5          | NIT-1+IFN- $\gamma$ +TNF- $\alpha$         | NIT-1+IFN- $\gamma$ +IL-1 $\beta$          | Internal Std |
| Gel 6          | $\alpha$ TC-1+IFN- $\gamma$ +TNF- $\alpha$ | $\alpha$ TC-1+IFN- $\gamma$ + IL-1 $\beta$ | Internal Std |
| <b>Batch 3</b> |                                            |                                            |              |
| Gel 7          | $\alpha$ TC-1                              | NIT-1                                      | Internal Std |
| Gel 8          | NIT-1+IFN- $\gamma$ +TNF- $\alpha$         | NIT-1+IFN- $\gamma$ +IL-1 $\beta$          | Internal Std |
| Gel 9          | $\alpha$ TC-1+IFN- $\gamma$ +TNF- $\alpha$ | $\alpha$ TC-1+IFN- $\gamma$ + IL-1 $\beta$ | Internal Std |

**Supplemental Table 2 CyDye labeling of protein samples from subcellular fractionation of islets**

|                    | Cy3                                               | Cy5                                               | Cy2          |
|--------------------|---------------------------------------------------|---------------------------------------------------|--------------|
| Cytosol            |                                                   |                                                   |              |
| Gel 1              | Islets                                            | Islets+IFN- $\gamma$                              | Internal Std |
| Gel 2              | Islets+IFN- $\gamma$ +TNF- $\alpha$ +IL-1 $\beta$ |                                                   | Internal Std |
| Membrane/organelle |                                                   |                                                   |              |
| Gel 1              | Islets                                            | Islets+IFN- $\gamma$                              | Internal Std |
| Gel 2              |                                                   | Islets+IFN- $\gamma$ +TNF- $\alpha$ +IL-1 $\beta$ | Internal Std |
| Nuclear            |                                                   |                                                   |              |
| Gel 1              | Islets+IFN- $\gamma$                              | Islets                                            | Internal Std |
| Gel 2              | Islets+IFN- $\gamma$ +TNF- $\alpha$ +IL-1 $\beta$ |                                                   | Internal Std |

Supplemental table 3: NIT-1 proteome

Supplemental table 4:  $\alpha$ TC-1 proteome

Supplemental table 5: Differentially expressed proteins in cytokine treated NIT-1

Supplemental table 6: Differentially expressed proteins in cytokine treated  $\alpha$ TC-1

Supplemental table 7: Islets proteome- cytosol

Supplemental table 8: Islets proteome- membrane/organelle

Supplemental table 9: Islets proteome- nuclear

Supplemental table 10: Differentially expressed proteins in cytokine treated islets- cytosol

Supplemental table 11: Differentially expressed proteins in cytokine treated islets- membrane

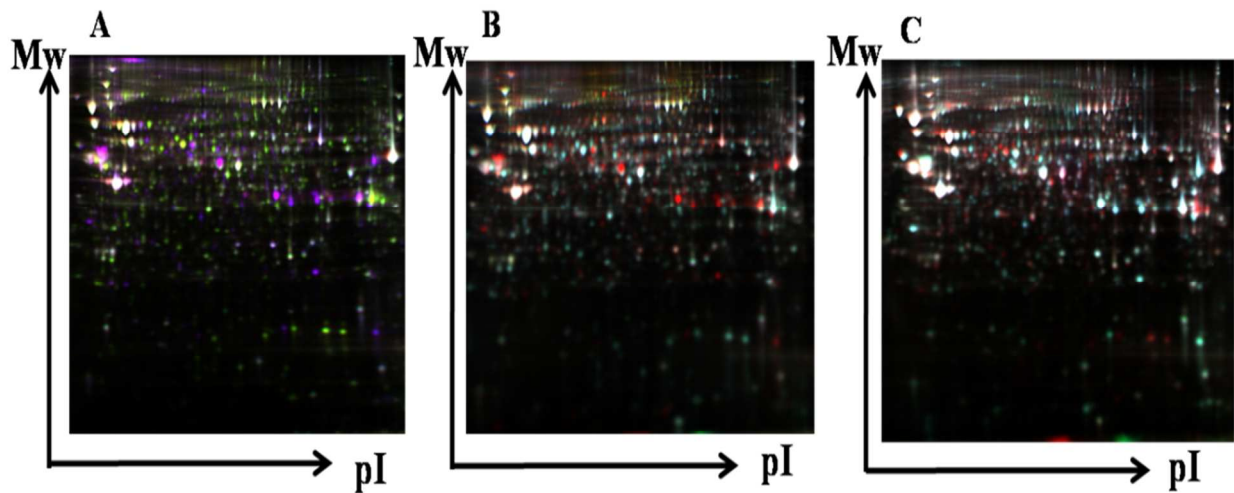

**Supplemental Fig 1: Overlay of 2D DIGE images from cytokine treated NIT-1 and  $\alpha$ TC-1**

Each gel contained 150  $\mu$ g of protein lysate. 50  $\mu$ g of samples were labelled with either Cy3 or Cy5 Dye and 50  $\mu$ g of internal standard was labelled with Cy2. Cy3, Cy5 and Cy2 labelled samples were pooled together and run on a single IEF gel followed by second dimension SDS PAGE. The gels were then scanned using 3 different lasers to give 3 different images of Cy3, Cy5 and Cy2. The gels in the figure show overlaid images of Cy3, Cy5 and Cy2. (A) NIT-1 and  $\alpha$ TC-1, (B) NIT-1+IFN- $\gamma$ +IL-1 $\beta$  and NIT-1+IFN- $\gamma$ +TNF- $\alpha$ , (C)  $\alpha$ TC-1+IFN- $\gamma$ +IL-1 $\beta$  and  $\alpha$ TC-1+IFN- $\gamma$ +TNF- $\alpha$ .

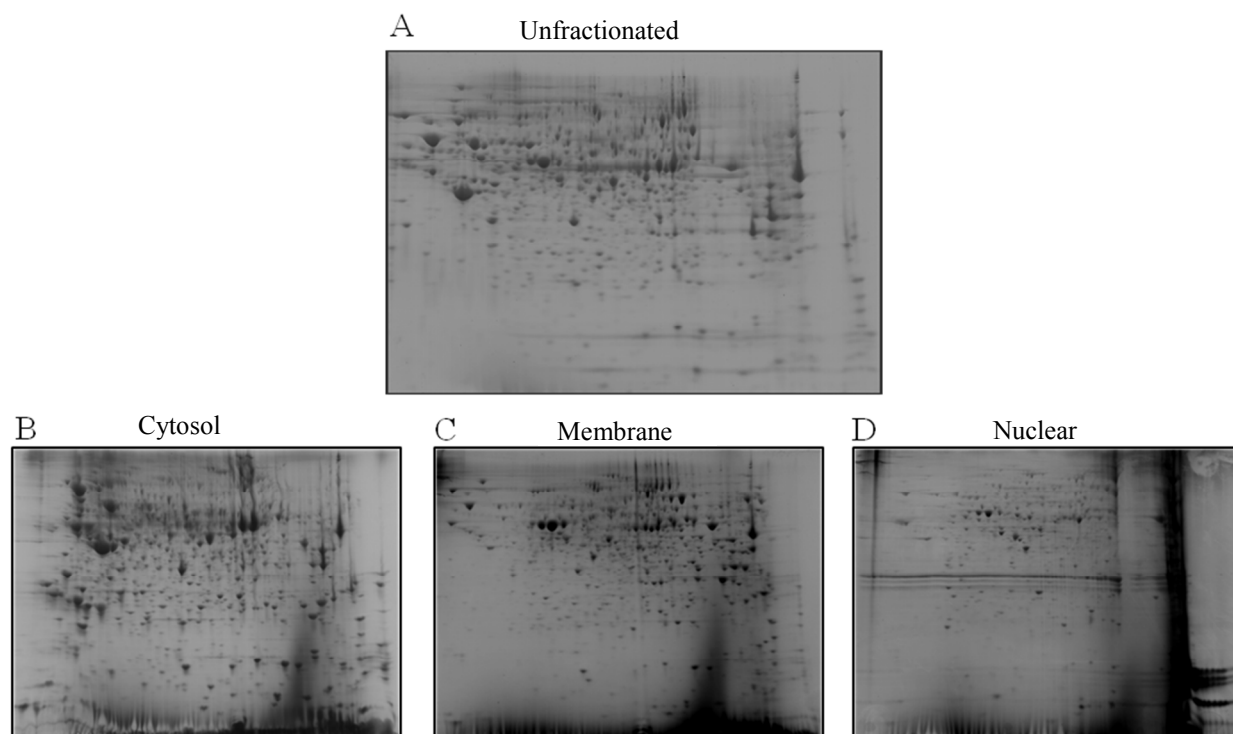

**Supplemental Fig 2: 2-D gels of islets subcellular fractions**

Subcellular fractionation on islets was performed using a commercially available kit (Calbiochem). Proteins from 3 fractions were precipitated using TCA plus DOC and 2-D gel electrophoresis was performed on the fractions and on whole islets protein lysates. The gels were stained with Coomassie blue (A) unfractionated islets, (B) cytosol fraction, (C) membrane/organelle and (D) nuclear fraction.

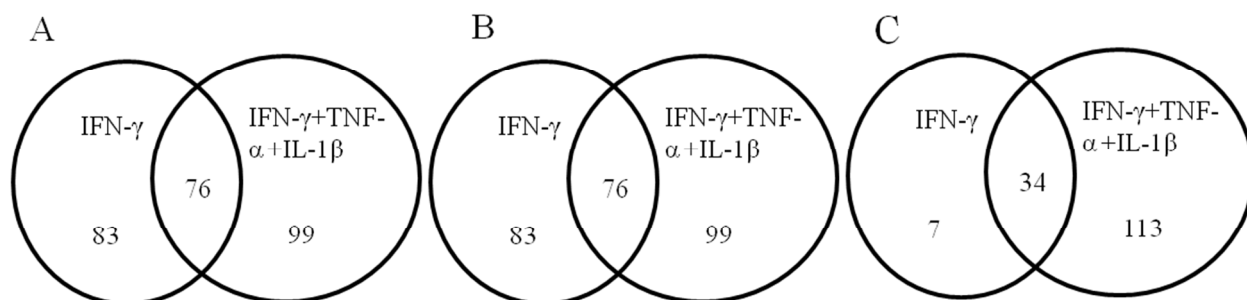

**Supplemental Fig 3: Number of proteins changed in islets subjected to different cytokine treatments**

Venn diagram showing the number of proteins changed after exposure to IFN- $\gamma$  and IFN- $\gamma$ +TNF- $\alpha$ +IL-1 $\beta$  for 24 hrs. The diagram shows proteins regulated by IFN- $\gamma$  alone, or IFN- $\gamma$ +TNF- $\alpha$ +IL-1 $\beta$  or both. (A) cytosol, (B) membrane/organelle, (C) nucleus.
